# Supplementary material
Source: publisher figshare collection journal article supplement (https://karger.figshare.com/ndownloader/files/15616022)
Supplement: Supplementary file 1 [file 15616022]

**Table S1. Sequences of *Calotes versicolor* contigs bearing sex-associated RAD-tag sequences.**

>Cversicolor_contig_flattened_line_5677740_Tag_32131

TTGTACTAACGAGACTGTTTGTGTTTTATCCAAGAAGTAGGGTTGGATGGGTGAGTTCCATGCCTGCTGGTGGTGAAAAGGAACTCTGAACATGCCATTTGAAGAGATATAAAGCATGGGTTCTCAAACTCAGCCATTCAGATGTTCTTGGACTAAAACTCTCCAAAGCCTTCACCACTAGGCTTGCTGGCAAAGACTTTTAGGAGTTGCAGTCCAGGAACACCTGC

>Cversicolor_contig_flattened_line_3257802_Tag_32131

TTGTACTAACGAGACTGTTTGTGTTTTATCCAAGAAGTAGGGTTGGATGGGTGAGTTCCATGCCTGCTGGTGGTGAAAAGGAACTCTGAACATGCCATTTGAAGAGATATAAAGCATGGGTTCTCAAACTCAGCCATTCAGATGTTCTTGGACTAAAACTCTCCAAAGCCTTCACCACTAGGCTTGCTGGCAAAGACTTCTAGGAGTTGCAGTCCAGGAACACCTGCGGGGCCAATTATCAGATCCACTGACTTAAAGCTGCTACAAACTGACTTGTGATTGTGGAGAGGTGTTCACTTAAGCGTACCTGTCC

>Cversicolor_contig_flattened_line_732202_Tag_29146

TTCCAGAGAAGGAAGAGCCCAGCACTTGGGGGCGGGGGTCCCACACATGCTTACATGTACTTTCTTCAGAAAGAAAGGAGCCACGCTGCCCCCTCTCCAAAGAGCCATTGAGGTGGAGGAGAAGGGAGGGGACCCCACCCAGGGTGCCGTTCCACTGTGCCCCCCTTCACAGTAGTTCAAAGAGGGCTTGTGGGAAGCATCCCCCTCCCCCTGCTCCATGGGAGGGTCTTCCTGGCCTCCCTTCACCTTCACTCTATTTCTCGTTGGGATGAGTGACAGGCTGAGCGAGGGGGGGGGGAGAAGAGGCTGCAGGCCACTCAAAATTTGAAGATGGGCCACATTTGGCCCCCAGGCCAGACTTTGGACATGTCTGCTATAGAGGCAGCACAGTCTATGCGCAGGAGGACACCTTTTTAATCCTCATGACTCTTCGCAGACCATGACATACAATCCCTCCACGTTTTACATGACATACAATTTCCTCCATTGTGCATCCCCCTTCTATCTGTTCCTCAGAAAGCAGCAAGTAGGTTACCCGTTTCGTATGTTTTAAGAAAATTGCAGGGCAGGGGAGCCCTTGAGCAGGGGACCTTGAGCAGCCCCAACATAGCTATGGCCCACGATCCCCACTGGATCCCACGCACAAGAGAGGAAAGTCTCAGCAAGTGTGGGACGGGGGCGTGAGAGCAGGACTCATACAGGCACACGGCCAGCAGAGAGAGTGAGGCAGCCGCTACTACCATCCTGGCACTGGCCTAGGTGACTCGGTGCCCATGCCCGGGAGCTCCTCTCTGCTGGGCAGAGGGGGAGGAAGAAGCCACCCTCTCACCTGCCCTAACCCCAGGCCAGCAAATCCGTACTTCTGACCATCTGCAACAGCCGGCTCCACTCCCACCTCCAGCCTGCCAACTGAGAGCCACGATACCCGGGCTCTACTTGCCAC

>Cversicolor_contig_flattened_line_637053_Tag_29146

CTTCACCTTCACTCTATTTCTCGTTGGGATGAGTGACAGGCTGAGCCGGGGGGGGGGGGAGAAGAGGCTGCAGGCCACTCAAAATTTGAAGATGGGCCACATTTGGCCCCCAGGCCAGACTTTGGACATGTCTGCTATAGAGGCAGCACAGTCTATGTGCTGGAGGACACCTTTTTAATCCTCATGACTCTTCGCAGACCATGACATACAATCCCTCCACGTTTTACATGACATACAATTTCCTCCATTGTGCATCCCCCTTCTATCTGTTCCTCAGAAAGCAGCAAGTAGGTTACCCGTTTTGTATGTTTTAAGAAAATTGCAGGGCAGGGGAGCCCTTGAGCAGGGGATCTTGAGCAGCCCCAACATAGCTATGGCCCATGATCCACACTGGATCCCACGCACAAGAGAGGAAAGTCTCAGCAAGTGTGGCACGGGGGCATGAGAGCAGGACTCACACAGGCACATGGCCAGCAGAGAGAGTGAGGCAGCCGCTGCTACCATCCTGGCGCTGGCCTAGGTGACTCGGCGCCCACGCCCGGGAGCTCCTCTCTGCTGGGCAGAGGGGGAGGAAGAAGCCACTCTCTCACCTGCCCTAACCCCAGGCCAGCAAATCCGTACTTCTGACCATCTGCAACAGCCGGCTCCACTCCCACCTCCAGCCTGCCAACTGAGAGCCACAACACCCAGGCTCTACTTGCCACGACGGAAAAACAGCCACGAAGGCTGATCAGGGAAGGAGGCGCCCCAGCTGCCTCTGCTGACCTGGAAAATATTTGTGCCATTTCTTCCTCAGCAAGTTGTCCAGACTCTCTGGCCACTGAGGGGGGGAGGGTCTGGGGCCGAGGCCCGTTCTCCAGCCCACAGAGGACCTGCAGGAGGCACCCCTGGAGTGGCTGGGTGGGCCTGGGGCCTGGCACAGTAAGAGGTGCCGTGAGGAAGGCCATCCTGGGGCGGTGGCGAGGCAGCCACTTTAGTCAGAGGGTAGCGGAGAGACTGTTGGGTGCCGAAGGTAGTAGAAGGCCAAGAATGTTGTTCAGGTCACTAGAGATGCACAGCAGTGAGTCCGTCAGGCACT

>Cversicolor_contig_flattened_line_1974696_Tag_18180

CCTGCTCTAGCCAGTTATAGAATTGGGAAGAAAAAAAAAACTCACCTGCAGGCTCTCTGCAGCTGATCTGTAGGCGGGGGCATTACTTGCCCCAGGAGATTTGGGGCTATTGGCATGTGTTTAATGGCAATAGCCCCGAGTCTCCTGGGGCTAGCAATGCTCCTGTCTCCAGGTTTAAGGCTTTCCATATTTGTTCTCGAAGGCCAGGATCTGATGGTTAGAACCACCTAAAGTACCTTTGTTAGATAGGCAGTATATAAATGCTCTAAATAAAATAAATGGTTGTGGGCTTTTCAAGCTATTTGATGTAAGATTGCTGAGTGTGTGGCCTCAAACTCAACACCAAAACACAGGGAGAATATCTAGTCCCCTGCGCTCCTGCCCTCTGAGGATACCAG

>Cversicolor_contig_flattened_line_495004_Tag_18180

GGCAAGGAGCTCAGGAAAACTAGGTGTTCTCTCATTGCTCTGGTCTCCAAAGTGAATGGAACTGGAATTTCTTCAGCTGAAATTATCCCATGTGGGAGAAAGGGTGGGTCATTGTATTGTGATGAAGGTGATTAAGGAGTTTCACTGTGATGGGAGGGGTAGCAGTGATCTTGATGGCTGTCGTTAGCTCCCTATTGTTCTGTGGATTGCTGTTTCCCTGAGAGGGAAACAGTTGAGCTAGGATCTTTTTTCACTTTGCACTTTTTAAGTACTGGAAGCCAGGCCTTATTTAACATAAGACTCGGTGATACTTTTCTAATTCTAATAGTACTGAGTTAGATACTAACGATGTACCATCCATTTTGGGGGATGCCCCCACCAAAGGATCAGCATATTGACCTGCTTTCTGCAAGTCTGGGTCTGTAAGACCCAATATTGTTTGGAACTTCTATACACCATGAGGGGAGATTTATACATTCCCTTCTTGCAGCCAGTTTCTCCCCTAATTTTATCTCCTGCCTAGAGCCTGAGAAAAATGACTTAAGAGGAGACAGTTTCAGTGTAGATTTAGCTCCTATGCATTTAGTTACATTGCTCAACAAGCCCAAGAGTGAGTGGAAGAACACCTGGGGAGTGGGAGGACTGATGTCTGGGACCAGCATTTGATTCTTTGGTGCACTTTTCCCTCTAGTCCAGGCATGTCCCAAGTATGGCCCTCCAGATGTTCTTGAACTGCAACTCCCAGAAGCCTTCAGCACTACCTGTGCTAGCCTTGAGTGCTACCTGTGCTAGCCTTTAGCATTATCTGAGCTAGCCTTCAGCACTAGCTGTGCTGGCAAGAGCTCCTGGGAGTTGCAGTTCAAGAACATCTAGAGGGCCACACTTTGGACATGCCTGCTCTAGCCATTTATAGAATTGGGAAGAAAAAAAACTCACCTGCAGGCTCTCTGCAGCTGATCTGTAGGCGGGGGCATTACTTGCCCCAGGAGATTTGGGGCTATTGGCATGTGTTTAATGGCAATAGCCCCGAGTCTCCTGAGGCTAGCAATGCTCCTGTCTCCAGGTTTAAGGCTTTCCATATTCGTTCTCAAAGGCCAGGATCTGATGGTTAGAACCACCTAAAGTACCTTTGTTAGATAGGCAGTATATAAATGCTCTAAATAAAATAAATGGTTGTGGGCTTTTCAAGCTATTTGATGTAAGATTGCTGAGTGTGTGGCCTCAAACTCAACACCAAAACACAGGGAGAATATCTAGTCCCCTGCGCTCCTGCCCTCTGAGGATACCAG

>Cversicolor_contig_flattened_line_1441506_Tag_50614

AGCAGGTGCATTAACTGCTTTTGCATTAGTTCCTGTGGGTTCCAACTTGACTTAAGACCATCATACACATATGAATTAAGTTTGTAAGTAGAGGCACCACTGTATTTCTCATAGAAATGCATTGAAATCTAAAAACCACTTGTAACAATTAATAGCATTTCAATGTATTCTTATGGGAAACATTGTTTCGACTTAAGACCAACTCAAGTTAAGACCATTCTCTATGTACCAATTGTGGTCATAACTAGAGGTACCACTGTGCTGGTTTATCCTTTGCCTTAGTCTCAATTCTGACATAGTTTTAGAGGTAGCAGGAAAGAAAAAGAACTTTGGCTAAGGTTTTGGCCTGTCTTTATTTGGGCCAAAAAAGGAGACTAATAATGGGAGTCTGTTGGAAGGCGACTGCTGAAATTCTGCACCTGCAGGAAGGAGCTGAGATGTACTTTTTCCTTGCCCAGATATGTTGGC

>Cversicolor_contig_flattened_line_495004_Tag_ 18180

GGCAAGGAGCTCAGGAAAACTAGGTGTTCTCTCATTGCTCTGGTCTCCAAAGTGAATGGAACTGGAATTTCTTCAGCTGAAATTATCCCATGTGGGAGAAAGGGTGGGTCATTGTATTGTGATGAAGGTGATTAAGGAGTTTCACTGTGATGGGAGGGGTAGCAGTGATCTTGATGGCTGTCGTTAGCTCCCTATTGTTCTGTGGATTGCTGTTTCCCTGAGAGGGAAACAGTTGAGCTAGGATCTTTTTTCACTTTGCACTTTTTAAGTACTGGAAGCCAGGCCTTATTTAACATAAGACTCGGTGATACTTTTCTAATTCTAATAGTACTGAGTTAGATACTAACGATGTACCATCCATTTTGGGGGATGCCCCCACCAAAGGATCAGCATATTGACCTGCTTTCTGCAAGTCTGGGTCTGTAAGACCCAATATTGTTTGGAACTTCTATACACCATGAGGGGAGATTTATACATTCCCTTCTTGCAGCCAGTTTCTCCCCTAATTTTATCTCCTGCCTAGAGCCTGAGAAAAATGACTTAAGAGGAGACAGTTTCAGTGTAGATTTAGCTCCTATGCATTTAGTTACATTGCTCAACAAGCCCAAGAGTGAGTGGAAGAACACCTGGGGAGTGGGAGGACTGATGTCTGGGACCAGCATTTGATTCTTTGGTGCACTTTTCCCTCTAGTCCAGGCATGTCCCAAGTATGGCCCTCCAGATGTTCTTGAACTGCAACTCCCAGAAGCCTTCAGCACTACCTGTGCTAGCCTTGAGTGCTACCTGTGCTAGCCTTTAGCATTATCTGAGCTAGCCTTCAGCACTAGCTGTGCTGGCAAGAGCTCCTGGGAGTTGCAGTTCAAGAACATCTAGAGGGCCACACTTTGGACATGCCTGCTCTAGCCATTTATAGAATTGGGAAGAAAAAAAACTCACCTGCAGGCTCTCTGCAGCTGATCTGTAGGCGGGGGCATTACTTGCCCCAGGAGATTTGGGGCTATTGGCATGTGTTTAATGGCAATAGCCCCGAGTCTCCTGAGGCTAGCAATGCTCCTGTCTCCAGGTTTAAGGCTTTCCATATTCGTTCTCAAAGGCCAGGATCTGATGGTTAGAACCACCTAAAGTACCTTTGTTAGATAGGCAGTATATAAATGCTCTAAATAAAATAAATGGTTGTGGGCTTTTCAAGCTATTTGATGTAAGATTGCTGAGTGTGTGGCCTCAAACTCAACACCAAAACACAGGGAGAATATCTAGTCCCCTGCGCTCCTGCCCTCTGAGGATACCAG
